# Supplementary material
Source: ML conference proceedings conference paper supplement (https://openaccess.thecvf.com/content/CVPR2026/html/Wang_Scone_Bridging_Composition_CVPR_2026_paper.html)
Supplement: Supplementary file 1 [file Wang_Scone_Bridging_Composition_CVPR_2026_supplemental.pdf]

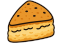

# Scone: Bridging Composition and Distinction in Subject-Driven Image Generation via Unified Understanding-Generation Modeling

## Supplementary Material

### Contents

|                                                                     |          |
|---------------------------------------------------------------------|----------|
| <b>1. Additional details of motivation</b>                          | <b>1</b> |
| <b>2. Additional details of training data</b>                       | <b>1</b> |
| 2.1. Synthesized data for data pool . . . . .                       | 1        |
| 2.2. Data filtering for refined single-candidate data               | 1        |
| 2.3. Details of multi-candidate data . . . . .                      | 1        |
| <b>3. Two-step decoupling instruction construction in SconeEval</b> | <b>2</b> |
| <b>4. Limitation and future work</b>                                | <b>2</b> |

### 1. Additional details of motivation

The similarity visualizations of instruction and image tokens in Figs.1(b) and 2(a) of the main paper are based on our base model, BAGEL [1]. To better highlight high-similarity regions, we retain the top 50% and generate masked images. We group layers into four sets (0-7, 8-15, 16-23, 24-27) based on the layer function analysis from [6]. In Fig. 2, we further show representative similarity and masked images for each group.

**Observation 1 (Comparison between understanding and generation experts)** The understanding expert captures more distinct semantic information from the image than the generation expert, as its image-token hidden states exhibit higher similarity to the instruction-token hidden states. It attends more strongly to instruction-relevant regions, such as candidate subjects.

**Observation 2 (Comparison across layers of the understanding expert)** Although similarity remains high at layers 16 and 24, region discrimination is strongest at layer 8, which provides more distinctive semantic cues for generation guidance. We therefore choose layer 8 to provide the semantic mask, and apply it to the later semantically discriminative layers 9–15.

### 2. Additional details of training data

#### 2.1. Synthesized data for data pool

As described in Sec.5.1 of the main paper, we synthesize 15K samples with 3-4 input images to fill gaps in the data pool and improve the composition capability of Scone. Examples are shown in Figs. 4 and 5.

```

Prompt for distinction scoring

### Given
- A subject description.
- The first image is the reference image.
- The second image is the target image.

### Task
Determine whether the described subject from the reference image appears
in the target image.

1. Identify the subject in the reference image based on the given description.
2. Judge presence in the target image:
- Focus strictly on presence, not on appearance similarity or instruction
compliance.
- Assign 1 if the subject is clearly identifiable in the target image.
- Assign 0 if the subject is not identifiable.
...
IMPORTANT: Your response must be either 0 or 1.
...

```

**Figure 1. Prompt for distinction scoring in SconeEval.** It determines whether the described reference subject *appears* in the target image.

#### 2.2. Data filtering for refined single-candidate data

As described in Sec.5.1 of the main paper, refined single-candidate samples are filtered by scoring subject consistency and instruction following with the VLM model Qwen3-VL-30B-A3B-Instruct. Key prompt contents are shown in Fig. 6(a), with emphasis on facial identity, text, and quantity. Each sample is scored from 0 to 4, and only those with a score of 4 are retained, as shown in Fig. 6(b).

#### 2.3. Details of multi-candidate data

**Single-subject data** Multi-candidate single-subject data are derived from single-candidate multi-subject data by reversing the reference and target images, so that the original reference becomes the target and the original target becomes the reference. This avoids the cost of generating new images. For instruction construction, Qwen3-30B-A3B-Instruct-2507 [3] identifies subjects, provides distinctive descriptions, and generates instructions based on the prompt in Fig. 7(a). The final dataset contains 2 case types, each with cross-category and intra-category candidate subjects. Examples are shown in Fig. 7(b).

**Multi-subject data** Multi-subject data are constructed from single-candidate multi-subject data by editing a subset of the reference images. Specifically, we use GPT-4o [2] to generate prompts for subjects from different categories, and then add at least one subject to the reference images using Qwen-Image-Edit-2509 [4]. The instruction

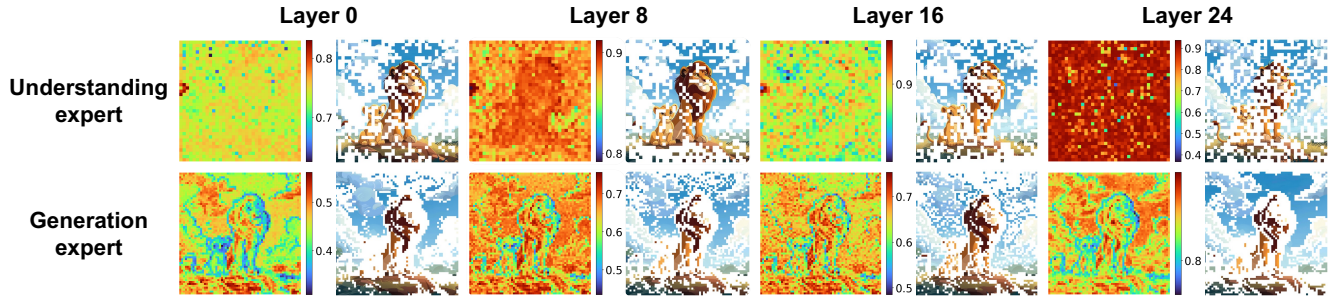

**Figure 2. Representative similarity and masked images for each layer group.** Similarity visualizations of instruction and image token hidden states from understanding and generation experts are based on our base model, BAGEL [1]. Masked images retain the top 50% of regions for clearer observation.

construction consists of two steps: (1) *subject identification* and (2) *subject replacement*. Subject identification follows the procedure described in Sec.4.2 of the main paper, with additional details provided in Sec. 3. Subject replacement uses Qwen3-30B-A3B-Instruct-2507 [3] and the prompt in Fig. 8(a) to replace the original subject description with the distinct description obtained in Step 1. The final dataset contains 5 case types, each including both cross-category and intra-category candidate subjects in the reference images. Examples are shown in Fig. 8(b).

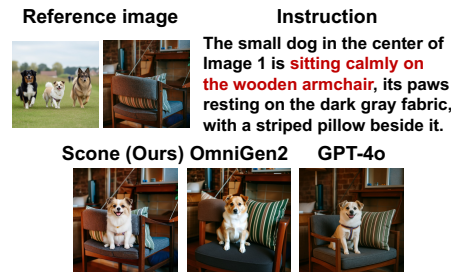

**Figure 3. Limitation of our Scone.**

### 3. Two-step decoupling instruction construction in SconeEval

As described in Sec.4.2 of the main paper, we adopt a two-step decoupling strategy that separates visual understanding from instruction generation, improving instruction stability and quality. As shown in Fig. 9, direct instruction construction often produces unusable results, such as incorrect image indices, ambiguous target subjects, and unrelated subjects. Our strategy first uses the vision-language model Qwen3-VL-30B-A3B-Instruct [3] to identify the target subject and generate a distinct description from the raw single-candidate and edited multi-candidate reference images, with prompt in Fig. 10(a). It then uses the language model Qwen3-30B-A3B-Instruct-2507 [3] to generate instructions solely from the subject descriptions, with prompt in Fig. 10(b).

### 4. Limitation and future work

Our Scone still shares a common limitation with existing methods: unrealistic interactions. As shown in Fig. 3, the generated dog passes through the chair, violating physical laws. This issue appears in both our Scone and OmniGen2 [5]. Future work will also explore more efficient mechanisms to reduce redundant image tokens for scalable generation in complex scenarios.

### References

- [1] Chaorui Deng, Deyao Zhu, Kunchang Li, Chenhui Gou, Feng Li, Zeyu Wang, Shu Zhong, Weihao Yu, Xiaonan Nie, Ziang Song, Guang Shi, and Haoqi Fan. Emerging properties in unified multimodal pretraining. *arXiv preprint arXiv:2505.14683*, 2025. 1, 2
- [2] OpenAI. Hello gpt-4o, 2025. 1
- [3] Qwen Team. Qwen3 technical report, 2025. 1, 2
- [4] Chenfei Wu, Jiahao Li, Jingren Zhou, Junyang Lin, Kaiyuan Gao, Kun Yan, Sheng ming Yin, Shuai Bai, Xiao Xu, Yilei Chen, Yuxiang Chen, Zecheng Tang, Zekai Zhang, Zhengyi Wang, An Yang, Bowen Yu, Chen Cheng, Dayiheng Liu, Deqing Li, Hang Zhang, Hao Meng, Hu Wei, Jingyuan Ni, Kai Chen, Kuan Cao, Liang Peng, Lin Qu, Minggang Wu, Peng Wang, Shuting Yu, Tingkun Wen, Wensen Feng, Xiaoxiao Xu, Yi Wang, Yichang Zhang, Yongqiang Zhu, Yujia Wu, Yuxuan Cai, and Zenan Liu. Qwen-image technical report, 2025. 1
- [5] Chenyuan Wu, Pengfei Zheng, Ruiran Yan, Shitao Xiao, Xin Luo, Yueze Wang, Wanli Li, Xiyan Jiang, Yexin Liu, Junjie Zhou, et al. Omnigen2: Exploration to advanced multimodal generation. *arXiv preprint arXiv:2506.18871*, 2025. 2
- [6] Zhi Zhang, Srishti Yadav, Fengze Han, and Ekaterina Shutova. Cross-modal information flow in multimodal large language models. In *Proceedings of the IEEE/CVF Conference on Computer Vision and Pattern Recognition (CVPR)*, pages 19781–19791, 2025. 1

| Reference image                                                                                                     | Instruction                                                                                                                                                                                                                                                                                 | Target image                                                                        |
|---------------------------------------------------------------------------------------------------------------------|---------------------------------------------------------------------------------------------------------------------------------------------------------------------------------------------------------------------------------------------------------------------------------------------|-------------------------------------------------------------------------------------|
|  <p>Character Character Object</p> | Combine these elements in a picture                                                                                                                                                                                                                                                         |  |
|  <p>Character Object Object</p>    | Place the <b>researcher</b> from Image 1, who is with short hair under a hair net, wearing the <b>royal blue corduroy yoga pants</b> from Image 2. Adorn the researcher with the <b>large hoop earrings</b> from Image 3                                                                    |  |
|  <p>Character Character Scene</p>  | Position the <b>Coach</b> from photo 1 on the left, and the <b>Lead scientist</b> from photo 2 on the right. In the background, display the <b>study wall map</b> bristling with thumbtacks and notes from photo 3                                                                          |  |
|  <p>Object Object Scene</p>        | Place the <b>Slow Cooker</b> from the first image in the foreground, with the <b>Brooch</b> from the second image elegantly placed near it. In the background, depict the <b>scene of the fog-laced morning</b> with a pagoda tower visible across a riverbend, as shown in the third image |  |

Figure 4. Examples of synthesized data with 3 input images. These cover 4 case types, including character-character/object interactions, characters with multiple objects, characters in scenes, and objects placed in scenes.

| Reference image                                                                                                                    | Instruction                                                                                                                                                                                                                                                                             | Target image                                                                        | Reference image                                                                                                                | Instruction                                                                                                                                                                                                                                                                                  | Target image                                                                         | Reference image                                                                                                               | Instruction                                                                                                                                                                                                                                                                   | Target image                                                                          |
|------------------------------------------------------------------------------------------------------------------------------------|-----------------------------------------------------------------------------------------------------------------------------------------------------------------------------------------------------------------------------------------------------------------------------------------|-------------------------------------------------------------------------------------|--------------------------------------------------------------------------------------------------------------------------------|----------------------------------------------------------------------------------------------------------------------------------------------------------------------------------------------------------------------------------------------------------------------------------------------|--------------------------------------------------------------------------------------|-------------------------------------------------------------------------------------------------------------------------------|-------------------------------------------------------------------------------------------------------------------------------------------------------------------------------------------------------------------------------------------------------------------------------|---------------------------------------------------------------------------------------|
|  <p>Character Character Character Character</p> | Place the <b>Adventurer</b> in <image_1>, the <b>Judge</b> in <image_2>, the <b>Friend mediator</b> in <image_3>, and the <b>Bride</b> in <image_4>                                                                                                                                     |  |  <p>Character Object Object Object</p>      | A <b>judge</b> with a side-part hairstyle stands dignified, the court badge visible on their robe. Nearby, a <b>gold rice cooker</b> sits. In the scene, an <b>elder butterfly</b> in the midst of molting displays its pale, shedding shell. A playful <b>orange kitten</b> frolics around. |  |  <p>Character Character Object Scene</p> | The ambiance is softly lit by the gentle glow of fairy lights strung above a convenience truck. Nearby, a <b>bystander</b> stands casually. A <b>player</b> with curly hair and a windbreaker. A <b>baby albino ferret</b> with its distinctive white fur and red eyes peeks. |  |
|  <p>Character Character Character Object</p>    | Place the <b>cutlery set</b> from the fourth image on a dining table. The <b>man</b> from the first image is standing in the foreground. Nearby, the <b>rider</b> from the second image is standing. In the background, the <b>man</b> from the third image is seated using a computer. |  |  <p>Object Object Object Object</p>         | Combine these items in a picture.                                                                                                                                                                                                                                                            |  |  <p>Character Object Object Scene</p>    | Depict a <b>teacher</b> wearing a blouse and skirt (image 1) standing beside a <b>cat</b> (Image 2). Surround them with <b>leaves</b> that are dark green and vegetative (Image 3). In the background, an ancient city gate is glowing at sunset (Image 4).                   |  |
|  <p>Character Character Object Object</p>       | Depict the <b>traveler</b> in <image_1>, alongside the <b>security person</b> in <image_2>, in a T-shirt and shorts, with dark skin. Place the <b>mint oven</b> with a non-stick interior from <image_3> in the background. Include the <b>white cat</b> from <image_4> sitting nearby. |  |  <p>Character Character Character Scene</p> | Combine these elements in a picture.                                                                                                                                                                                                                                                         |  |  <p>Object Object Object Scene</p>       | Place the <b>Jade Carving</b> from Image 1 on a wooden table next to the <b>Tennis Racket</b> from Image 2. Position the <b>Terracotta Saucer</b> from Image 3 nearby, with the <b>Violin</b> and bow from Image 4 resting on a windowsill in the background.                 |  |

Figure 5. Examples of synthesized data with 4 input images. These cover 9 case types, including combinations of characters, objects, and scenes, as well as their interactions and mixed compositions.

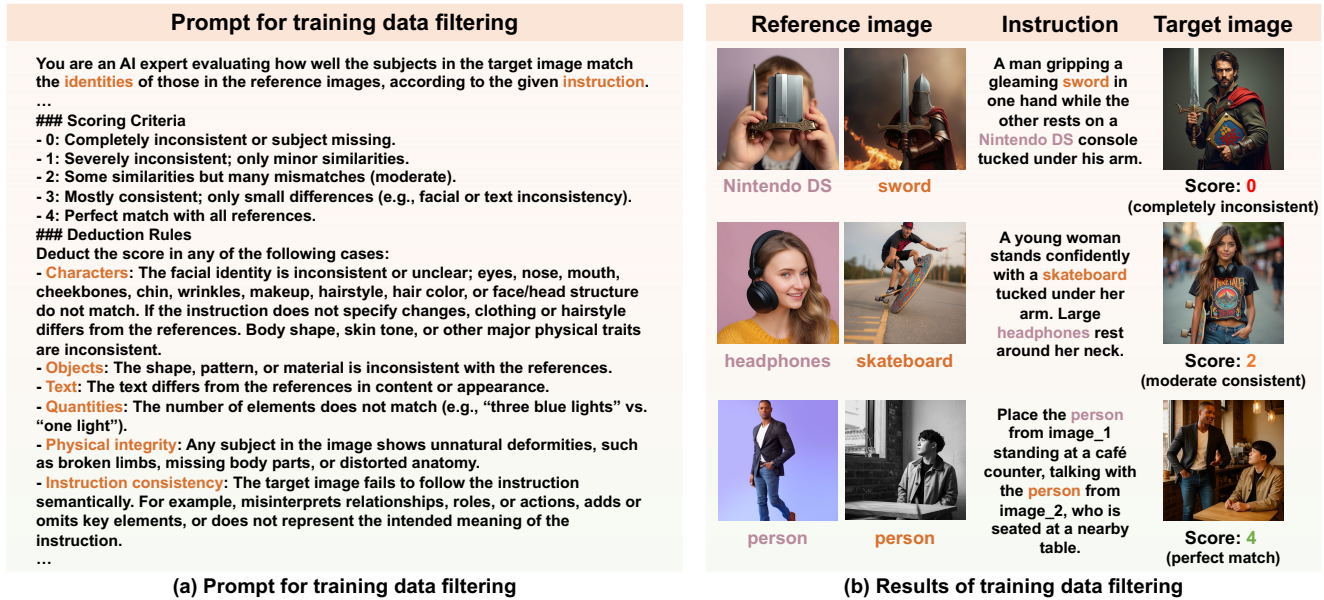

Figure 6. Data filtering for refined single-candidate data. (a) Prompt for filtering. Key prompt components are shown. (b) Filtering results. Samples are scored from 0 to 4, and only those with a score of 4 are retained.

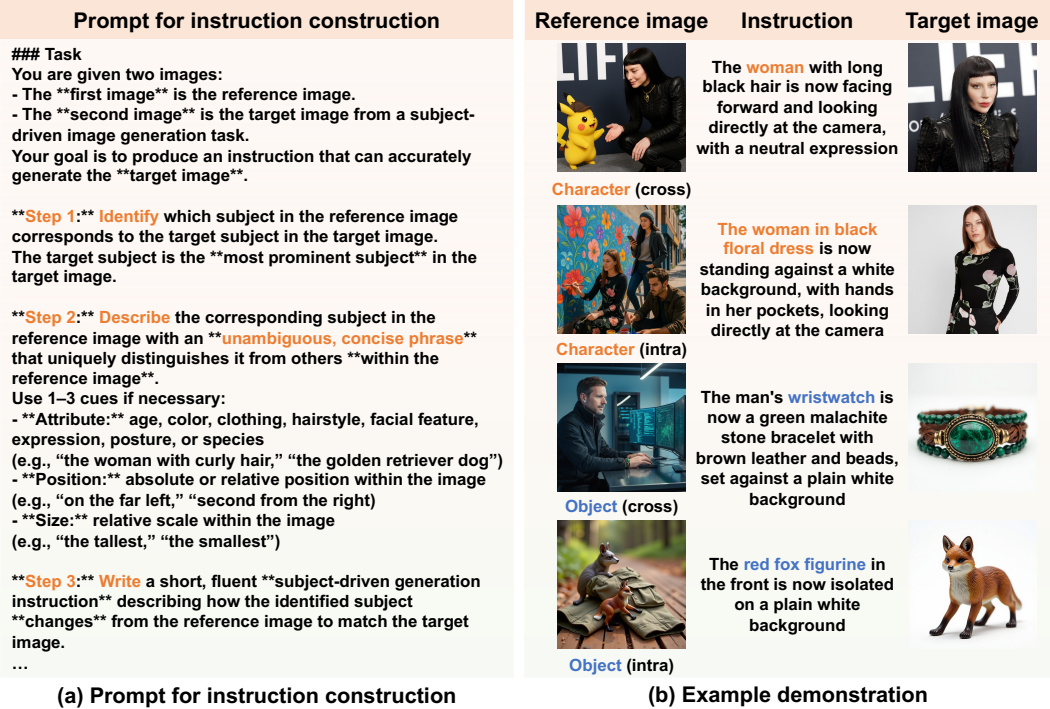

Figure 7. Multi-candidate single-subject data construction. (a) Prompt for instruction construction. The prompt instructs the vision-language model to identify subjects, provide distinct descriptions, and generate instructions. (b) Example demonstration. It includes 2 case types, Character and Object, each with cross-category and intra-category candidate subjects in the reference images.

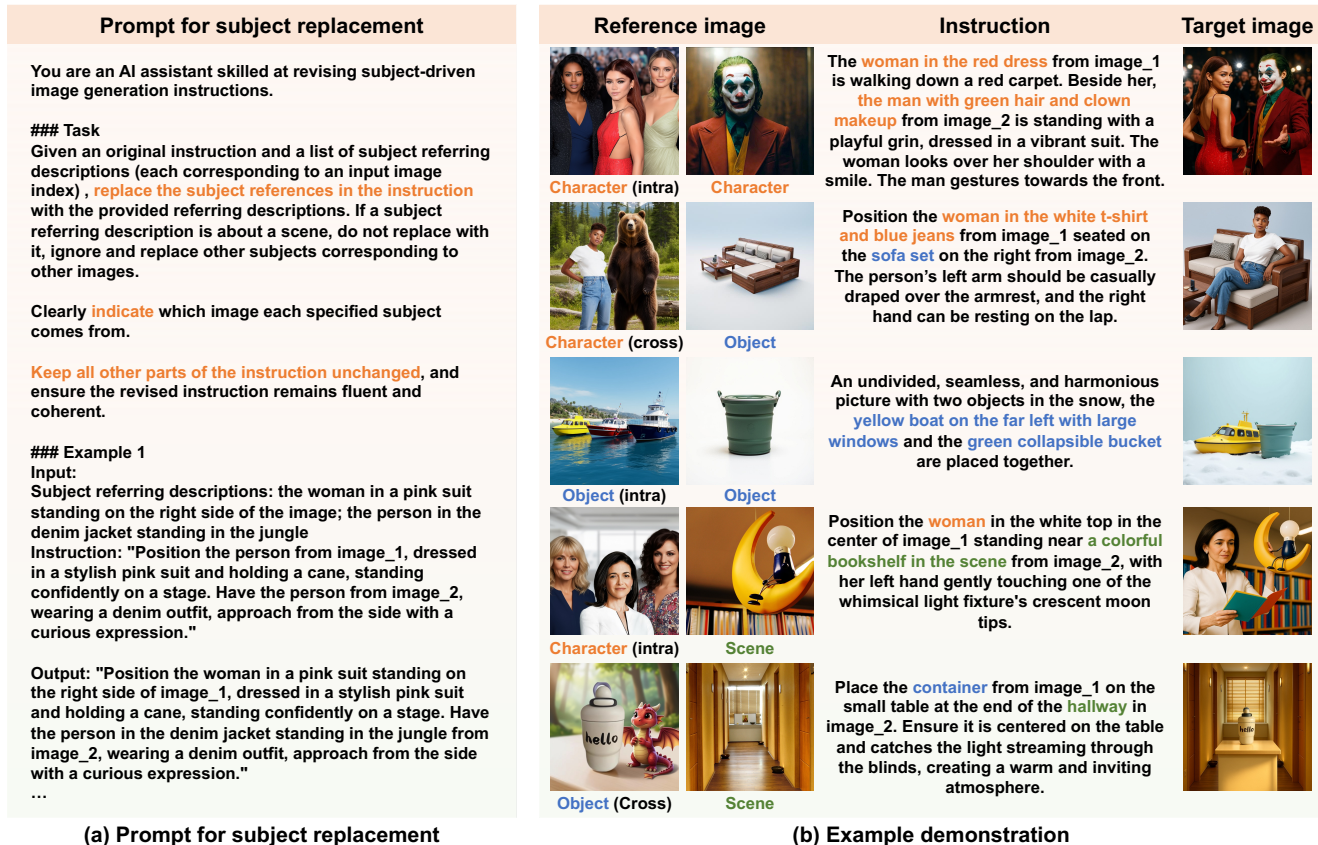

**Figure 8. Multi-candidate multi-subject data construction.** (a) Prompts for subject replacement. The prompts guide the language model to replace the original subject description with a new distinct description for the edited multi-candidate reference images. (b) **Example demonstration.** It includes 5 case types: Character+Character, Character+Object, Object+Object, Character+Scene, and Object+Scene, each with cross-category and intra-category candidate subjects in the reference images.

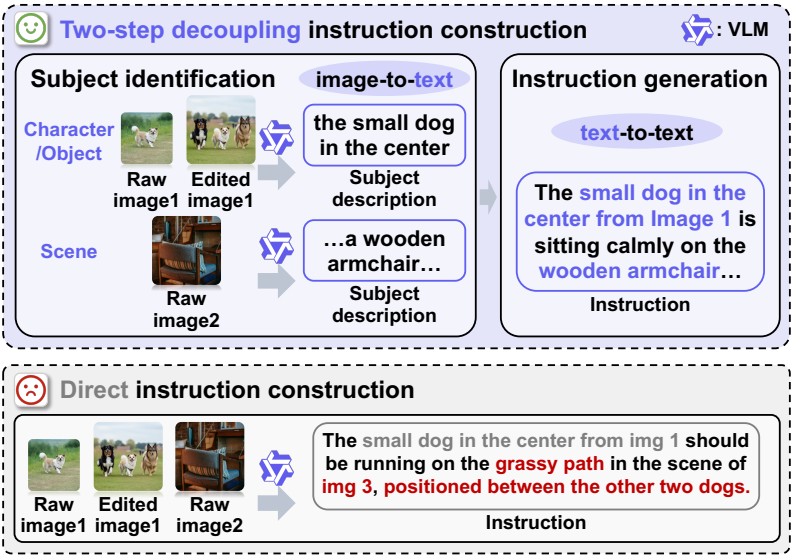

**Figure 9. Comparison of two instruction construction strategies.** The two-step decoupling strategy separates image-to-text and text-to-text generation, reducing cross-image interference and avoiding errors in the direct strategy, such as incorrect image indices, ambiguous target subjects, and unrelated subjects.

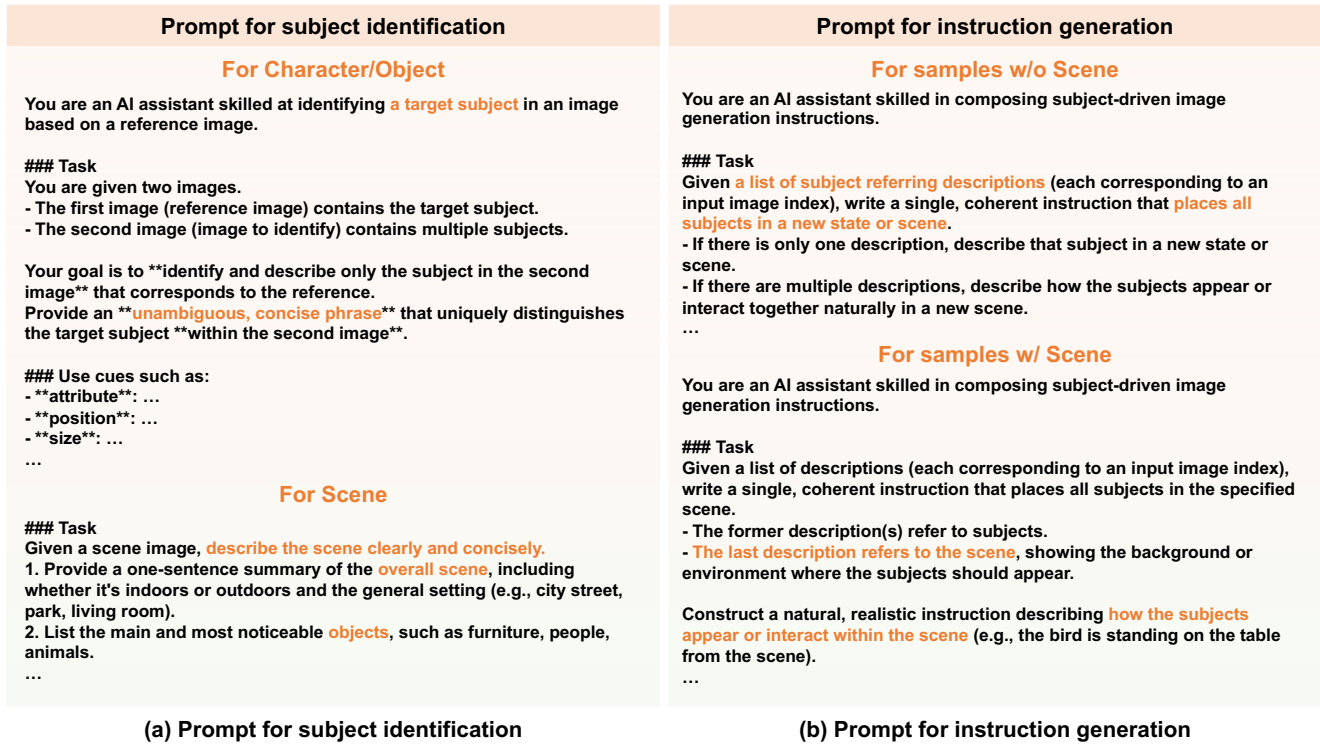

**Figure 10. Prompts for instruction construction in SceneEval.** (a) **Prompt for subject identification.** For Character or Object images, provide a concise subject description; for Scene images, describe the setting and key objects. (b) **Prompt for instruction generation.** Generate instructions from the subject descriptions, emphasizing subject-subject and subject-scene interactions.
